# Supplementary material for: Unifying Candidate Gene and GWAS Approaches in Asthma
Source: PubMed Central journal article supplement (PMC2980484; doi:10.1371/journal.pone.0013894), 2010-11-12
Supplement: pone.0013894.s002.pdf [file pone.0013894.s002.pdf]

| ADAM33 | SNPs                                          | minor allele | OR genotyping | OR imputation HM2 (HM3) | CI_L 95% genotyping | CI_L 95% imputation HM2 (HM3) | CI_U 95% genotyping | CI_U 95% imputation HM2 (HM3) | p-value genotyping | p-value imputation HM2 (HM3) | R2   |
|--------|-----------------------------------------------|--------------|---------------|-------------------------|---------------------|-------------------------------|---------------------|-------------------------------|--------------------|------------------------------|------|
|        | rs6084432                                     | A            | 1.177         | 1.177 (1.177)           | 0.965               | 0.965 (0.9648)                | 1.436               | 1.436 (1.436)                 | 0.108              | 0.108 (0.1082)               | 1    |
|        | rs12624874                                    | T            |               | 1.093 (1.026)           |                     | 0.871 (0.8133)                | 1.372 (1.295)       |                               | 0.441 (0.827)      |                              |      |
|        | rs633330                                      | T            |               | 2.12                    |                     | 0.65                          | 6.92                |                               | 0.21               |                              |      |
|        | rs630909                                      | A            |               | 1.11                    |                     | 0.91                          | 1.35                |                               | 0.33               |                              |      |
|        | rs512625                                      | A            | 1.037         | 1.046 (1.037)           | 0.886               | 0.891 (0.8856)                | 1.215               | 1.229 (1.215)                 | 0.649              | 0.584 (0.6492)               | 0.95 |
|        | rs2787093                                     | C            |               | 0.98                    |                     | 0.78                          | 1.23                |                               | 0.86               |                              |      |
|        | rs3746631                                     | C            | 1.040         | 1.034 (1.011)           | 0.669               | 0.619 (0.5807)                | 1.616               | 1.730 (1.761)                 | 0.862              | 0.898 (0.9683)               | 0.31 |
|        | rs2787094                                     | C            | 1.122         |                         | 0.937               |                               | 1.342               |                               | 0.211              |                              |      |
|        | rs677044                                      | G            |               | 0.94                    |                     | 0.74                          | 1.1                 |                               | 0.31               |                              |      |
|        | rs3918400                                     | A            | 0.975         | 1.03                    | 0.645               | 0.62                          | 1.473               | 1.73                          | 0.904              | 0.9                          | 0.30 |
|        | rs43749                                       | T            | 1.200         |                         | 0.964               |                               | 1.493               |                               | 0.103              |                              |      |
|        | rs628977                                      | -            | -             | -                       | -                   | -                             | -                   | -                             | -                  | -                            | -    |
|        | rs678881                                      | C            |               | 0.91                    |                     | 0.76                          | 1.09                |                               | 0.29               |                              |      |
|        | rs2280089                                     | A            | 1.161         | 1.160 (1.18)            | 0.928               | 0.934 (0.9475)                | 1.452               | 1.441 (1.469)                 | 0.191              | 0.180 (0.1395)               | 0.86 |
|        | rs2280090                                     | A            | 1.105         |                         | 0.894               |                               | 1.366               |                               | 0.357              |                              |      |
|        | rs2280091                                     | A            |               | 1.093 (1.126)           |                     | 0.886 (0.9067)                |                     | 1.350 (1.399)                 |                    | 0.407 (0.2823)               |      |
|        | rs574174                                      | T            | 1.149         |                         | 0.957               |                               | 1.379               |                               | 0.138              |                              |      |
|        | rs44707                                       | G            | 0.895         |                         | 0.763               |                               | 1.050               |                               | 0.173              |                              |      |
|        | rs598418                                      | G            |               | 0.924 (0.99)            |                     | 0.787 (0.8469)                |                     | 1.084 (1.158)                 |                    | 0.330 (0.9007)               |      |
|        | rs2853209                                     | A            | 1.042         |                         | 0.887               |                               | 1.224               |                               | 0.619              |                              |      |
|        | rs528557 **                                   | G            | 1.504         |                         | 1.247               |                               | 1.813               |                               | 0.000019           |                              |      |
|        | rs3918396                                     | T            | 1.291         |                         | 0.996               |                               | 1.672               |                               | 0.054              |                              |      |
|        | rs612709                                      | A            | 1.177         |                         | 0.948               |                               | 1.461               |                               | 0.139              |                              |      |
|        | rs3918395                                     | A            | 1.123         | 1.059 (1.118)           | 0.894               | 0.856 (0.8969)                | 1.411               | 1.310 (1.394)                 | 0.320              | 0.600 (0.3211)               | 0.67 |
|        | rs2280092                                     | -            | -             | -                       | -                   | -                             | -                   | -                             | -                  | -                            | -    |
|        | rs511898                                      | T            | 1.127         | 1.103                   | 0.961               | 0.9399                        | 1.323               | 1.294                         | 0.142              | 0.23                         |      |
|        | rs2787095                                     | C            |               | 1.07                    |                     | 0.91                          | 1.26                |                               | 0.4                |                              |      |
|        | rs621394                                      | A            |               | 2.12                    |                     | 0.65                          | 6.92                |                               | 0.21               |                              |      |
|        | rs2853210                                     | T            |               | 0.939 (0.9078)          |                     | 0.773 (0.7463)                | 1.140 (1.104)       |                               | 0.523 (0.3336)     |                              |      |
|        | rs4987246                                     | G            |               | 1.68                    |                     | 0.74                          | 1.84                |                               | 0.22               |                              |      |
|        | rs487377                                      | A            | 1.054         | 1.071 (1.054)           | 0.879               | 0.894 (0.8794)                | 1.264               | 1.284 (1.264)                 | 0.569              | 0.455 (0.5679)               | 0.98 |
|        | rs570269                                      | C            |               | 0.99                    |                     | 0.81                          | 1.22                |                               | 0.94               |                              |      |
|        | rs7354032                                     | T            |               | 0.774 (1.029)           |                     | 0.507 (0.8771)                |                     | 1.184 (1.208)                 |                    | 0.238 (0.7237)               |      |
|        | rs554743                                      | G            | 1.038         | 1.03                    | 0.881               | 0.88                          | 1.222               | 1.21                          | 0.658              | 0.71                         | 0.98 |
|        | rs2853215                                     | A            | 1.085         | 1.085 (1.082)           | 0.917               | 0.917 (0.9141)                | 1.284               | 1.284 (1.28)                  | 0.340              | 0.339 (0.3607)               | 1    |
|        | rs8124504                                     | T            |               | 1.01                    |                     | 0.64                          | 1.6                 |                               | 0.96               |                              |      |
|        | rs532448                                      | T            |               | 1                       |                     | 0.86                          | 1.17                |                               | 0.97               |                              |      |
|        | rs8124665                                     | G            |               | 1.3                     |                     | 0.68                          | 2.5                 |                               | 0.43               |                              |      |
| CCL5   | SNPs                                          | minor allele | OR genotyping | OR imputation HM2 (HM3) | CI_L 95% genotyping | CI_L 95% imputation HM2 (HM3) | CI_U 95% genotyping | CI_U 95% imputation HM2 (HM3) | p-value genotyping | p-value imputation HM2 (HM3) | R2   |
|        | rs16963927                                    | G            |               | 0.649 (0.8788)          |                     | 0.380 (0.6258)                |                     | 1.106 (1.234)                 |                    | 0.112 (0.4554)               |      |
|        | rs2280788                                     | C            | 1.217         | 0.75                    | 0.775               | 0.2                           | 1.912               | 2.8                           | 0.393              | 0.67                         | 0.12 |
|        | rs1800825                                     | G            |               | 1.12                    |                     | 0.34                          | 3.7                 |                               | 0.85               |                              |      |
|        | rs2107538                                     | T            | 1.190         | 1.088 (1.095)           | 0.978               | 0.889 (0.9086)                | 1.448               | 1.331 (1.32)                  | 0.082              | 0.412 (0.3395)               | 0.78 |
|        | rs4239253                                     | C            |               | 1.22                    |                     | 0.53                          | 2.8                 |                               | 0.64               |                              |      |
|        | rs4796123                                     | C            |               | 1.204 (1.175)           |                     | 0.970 (0.954)                 |                     | 1.495 (1.448)                 |                    | 0.093 (0.1291)               |      |
| CD14   | SNPs                                          | minor allele | OR genotyping | OR imputation HM2 (HM3) | CI_L 95% genotyping | CI_L 95% imputation HM2 (HM3) | CI_U 95% genotyping | CI_U 95% imputation HM2 (HM3) | p-value genotyping | p-value imputation HM2 (HM3) | R2   |
|        | rs778588                                      | C            |               | 0.970 (0.9388)          |                     | 0.826 (0.7982)                |                     | 1.139 (1.104)                 |                    | 0.711 (0.446)                |      |
|        | rs11574651                                    | A            |               | 0.47                    |                     | 0.12                          | 1.87                |                               | 0.28               |                              |      |
|        | rs4914                                        | G            |               | 0.92                    |                     | 0.75                          | 1.13                |                               | 0.43               |                              |      |
|        | rs2569190                                     | A            | 1.011         | 0.99                    | 0.865               | 0.85                          | 1.182               | 1.16                          | 0.890              | 0.92                         | 0.83 |
|        | rs5744448                                     | T            |               | 2.196 (0.6662)          |                     | 0.566 (0.2104)                |                     | 8.527 (2.109)                 |                    | 0.256 (0.4898)               |      |
|        | rs5744442                                     | C            |               | 0.86                    |                     | 0.6                           | 1.23                |                               | 0.4                |                              |      |
|        | rs5744441                                     | A            |               | 1.031 (1.06)            |                     | 0.864 (0.8885)                |                     | 1.231 (1.264)                 |                    | 0.734 (0.5183)               |      |
| DPP10  | SNPs                                          | minor allele | OR genotyping | OR imputation HM2 (HM3) | CI_L 95% genotyping | CI_L 95% imputation HM2 (HM3) | CI_U 95% genotyping | CI_U 95% imputation HM2 (HM3) | p-value genotyping | p-value imputation HM2 (HM3) | R2   |
|        | rs1036022 (rs13392783 / r <sup>2</sup> =0.88) | C            | 0.939         | 0.94                    | 0.808               | 0.81                          | 1.092               | 1.1                           | 0.416              | 0.45                         | 1    |
|        | rs10208402                                    | C            |               | 0.944 (0.9554)          |                     | 0.814 (0.8242)                |                     | 1.095 (1.107)                 |                    | 0.445 (0.5443)               |      |
|        | rs1367178                                     | G            |               | 1.005 (0.9918)          |                     | 0.654 (0.669)                 |                     | 1.542 (1.47)                  |                    | 0.984 (0.9675)               |      |
|        | rs17048357                                    | T            |               | 1.1                     |                     | 0.57                          | 2.13                |                               | 0.77               |                              |      |
|        | rs17048359                                    | C            |               | 0.976 (1.008)           |                     | 0.823 (0.8546)                |                     | 1.157 (1.189)                 |                    | 0.778 (0.9244)               |      |
|        | rs10192393                                    | C            | 1.053         | 1.057 (1.053)           | 0.906               | 0.909 (0.9059)                | 1.224               | 1.229 (1.224)                 | 0.500              | 0.475 (0.5003)               | 1    |
|        | rs1430092                                     | A            |               | 0.85                    |                     | 0.65                          | 1.2                 |                               | 0.36               |                              |      |
|        | rs12473953                                    | C            |               | 1.005 (0.9894)          |                     | 0.857 (0.8428)                |                     | 1.180 (1.161)                 |                    | 0.948 (0.8963)               |      |
|        | rs1430091                                     | A            |               | 1.04                    |                     | 0.86                          | 1.28                |                               | 0.67               |                              |      |
|        | rs4849333                                     | C            |               | 0.937 (0.8835)          |                     | 0.776 (0.7329)                |                     | 1.131 (1.065)                 |                    | 0.499 (0.1937)               |      |
|        | rs1430090                                     | G            | 1.049         | 1.040 (1.032)           | 0.891               | 0.884 (0.8776)                | 1.236               | 1.224 (1.214)                 | 0.565              | 0.638 (0.7014)               | 1    |
|        | rs6737251                                     | T            | 0.975         | 0.975 (0.9753)          | 0.833               | 0.833 (0.833)                 | 1.142               | 1.142 (1.142)                 | 0.756              | 0.756 (0.7557)               | 1    |
|        | rs17048372                                    | T            |               | 1.02                    |                     | 0.84                          | 1.23                |                               | 0.88               |                              |      |
|        | rs6709636                                     | A            |               | 1.41                    |                     | 0.4                           | 5.01                |                               | 0.6                |                              |      |
|        | rs11685217                                    | T            | 1.006         | 1.006 (1.006)           | 0.833               | 0.833 (0.8327)                | 1.216               | 1.216 (1.216)                 | 0.947              | 0.947 (0.9469)               | 1    |
|        | rs1430089                                     | G            |               | 0.98                    |                     | 0.84                          | 1.15                |                               | 0.78               |                              |      |
|        | rs17764091                                    | G            |               | 1.006 (0.9758)          |                     | 0.802 (0.7821)                |                     | 1.261 (1.218)                 |                    | 0.962 (0.8284)               |      |
|        | rs17764121 *                                  | C            |               | 5.21                    |                     | 1.15                          | 23.61               |                               | 0.03               |                              |      |
|        | rs17048408                                    | C            |               | 0.73                    |                     | 0.37                          | 1.46                |                               | 0.38               |                              |      |
|        | rs7559909 (rs13011555 / r <sup>2</sup> =0.9)  | A            | 0.946         | 0.944 (0.9443)          | 0.811               | 0.809 (0.8092)                | 1.104               | 1.102 (1.102)                 | 0.483              | 0.467 (0.4667)               | 1    |
|        | rs17048446                                    | A            |               | 0.65                    |                     | 0.4                           | 1.06                |                               | 0.08               |                              |      |
|        | rs17048451                                    | C            |               | 0.56                    |                     | 0.2                           | 1.54                |                               | 0.26               |                              |      |
|        | rs10496465                                    | G            | 0.929         | 0.931 (0.9307)          | 0.755               | 0.757 (0.7565)                | 1.143               | 1.145 (1.145)                 | 0.486              | 0.497 (0.4968)               | 1    |
|        | rs4849338                                     | C            |               | 1                       |                     | 0.86                          | 1.18                |                               | 0.96               |                              |      |
|        | rs13397905                                    | C            |               | 0.56                    |                     | 0.13                          | 2.35                |                               | 0.43               |                              |      |
|        | rs1820924                                     | T            |               | 1.032 (0.9804)          |                     | 0.849 (0.8099)                |                     | 1.255 (1.187)                 |                    | 0.749 (0.8393)               |      |
|        | rs6750402                                     | C            | 1.006         | 1.012 (1.008)           | 0.847               | 0.852 (0.8486)                | 1.195               | 1.202 (1.197)                 | 0.946              | 0.892 (0.9285)               | 1    |
|        | rs10187644                                    | T            |               | 0.920 (0.9084)          |                     | 0.792 (0.7813)                |                     | 1.070 (1.056)                 |                    | 0.278 (0.2117)               |      |
|        | rs1346762                                     | G            | 1.110         | 1.112 (1.112)           | 0.947               | 0.950 (0.9495)                | 1.300               | 1.303 (1.303)                 | 0.197              | 0.188 (0.1877)               | 1    |
|        | rs1346763                                     | T            |               | 1.096 (1.056)           |                     | 0.940 (0.9059)                |                     | 1.278 (1.231)                 |                    | 0.241 (0.4862)               |      |
|        | rs1430101                                     | G            | 1.043         | 1.028 (1.03)            | 0.866               | 0.853 (0.8559)                | 1.256               | 1.239 (1.24)                  | 0.661              | 0.772 (0.7535)               | 0.97 |
|        | rs17048470                                    | A            |               | 0.68                    |                     | 0.37                          | 1.23                |                               | 0.2                |                              |      |
|        | rs2420165                                     | T            |               | 0.993 (0.8931)          |                     | 0.743 (0.6958)                |                     | 1.325 (1.146)                 |                    | 0.960 (0.3744)               |      |
|        | rs11674031                                    | G            |               | 0.857 (0.8823)          |                     | 0.709 (0.7259)                |                     | 1.036 (1.072)                 |                    | 0.110 (0.2084)               |      |
|        | rs1430103                                     | G            |               | 1.042 (1.034)           |                     | 0.859 (0.8594)                |                     | 1.264 (1.245)                 |                    | 0.675 (0.7215)               |      |
|        | rs6746254                                     | A            |               | 1.089 (1.073)           |                     | 0.863 (0.8618)                |                     | 1.374 (1.335)                 |                    | 0.471 (0.5304)               |      |
|        | rs10048644                                    | T            |               | 0.97                    |                     | 0.75                          | 1.27                |                               | 0.84               |                              |      |
|        | rs11123246                                    | T            |               | 0.944 (0.8862)          |                     | 0.742 (0.7287)                |                     | 1.201 (1.078)                 |                    | 0.638 (0.2263)               |      |
|        | rs1430108                                     | C            | 1.006         | 1.009 (1.003)           | 0.865               | 0.867 (0.8621)                | 1.170               | 1.173 (1.166)                 | 0.940              | 0.912 (0.9733)               | 1    |
|        | rs6542214                                     | C            | 0.983         | 0.985 (0.9856)          | 0.844               | 0.845 (0.8459)                | 1.146               | 1.148 (1.148)                 | 0.828              | 0.842 (0.8521)               | 0.97 |
|        | rs12987334                                    | C            |               | 0.865 (0.9043)          |                     | 0.652 (0.6871)                |                     | 1.147 (1.119)                 |                    | 0.314 (0.4731)               |      |
|        | rs1835328                                     | T            |               | 0.99                    |                     | 0.83                          | 1.18                |                               | 0.93               |                              |      |
|        | rs7590021                                     | C            |               | 0.972 (1.033)           |                     | 0.790 (0.8503)                |                     | 1.196 (1.255)                 |                    | 0.786 (0.7436)               |      |
|        | rs6741327                                     | A            |               | 1.08                    |                     | 0.88                          | 1.31                |                               | 0.47               |                              |      |
|        | rs10514812                                    | A            | 1.219         | 1.214 (1.221)           | 0.947               | 0.942 (0.9488)                | 1.569               | 1.564 (1.572)                 | 0.124              | 0.134 (0.1207)               | 1    |
|        | rs10496466                                    | A            | 1.007         | 1.002 (1.015)           | 0.829               | 0.822 (0.8359)                | 1.224               | 1.221 (1.233)                 | 0.941              | 0.985 (0.879)                | 0.97 |
|        | rs6729737                                     | G            | 1.031         | 1.035 (1.031)           | 0.880               | 0.883 (0.8801)                | 1.209               | 1.213 (1.208)                 | 0.705              | 0.672 (0.7034)               | 1    |
|        | rs996135                                      | A            | 1.090         | 1.094 (1.093)           | 0.917               | 0.921 (0.9205)                | 1.295               | 1.299 (1.299)                 | 0.328              | 0.307 (0.3091)               | 1    |
|        | rs12999482                                    | A            |               | 0.855 (0.8485)          |                     | 0.667 (0.6613)                |                     | 1.098 (1.089)                 |                    | 0.220 (0.1965)               |      |
|        | rs1965088                                     | G            | 1.002         | 1.000 (1.005)           | 0.827               | 0.825 (0.8291)                | 1.213               | 1.211 (1.218)                 | 0.987              | 0.998 (0.9617)               | 1    |
|        | rs17715313                                    | C            |               | 0.98                    |                     | 0.68                          | 1.43                |                               | 0.93               |                              |      |
|        | rs7582739                                     | C            | 1.217         | 1.167 (1.169)           | 0.939               | 0.904 (0.905)                 | 1.576               | 1.503 (1.509)                 | 0.138              | 0.235 (0.232)                | 0.99 |
|        | rs1347502                                     | C            |               | 0.974 (0.9522)          |                     | 0.808 (0.7985)                |                     | 1.174 (1.136)                 |                    | 0.781 (0.5858)               |      |
|        | rs17782840                                    | A            |               | 1.053 (0.9971)          |                     | 0.815 (0.7757)                |                     | 1.360 (1.282)                 |                    | 0.694 (0.9818)               |      |
|        | rs785033                                      | C            |               | 1.02                    |                     | 0.87                          | 1.2                 |                               | 0.81               |                              |      |
|        | rs785041                                      | G            |               | 1.227 (1.093)           |                     | 0.885 (0.8045)                |                     | 1.702 (1.484)                 |                    | 0.220 (0.5708)               |      |
|        | rs17715765                                    | G            |               | 0.98                    |                     | 0.63                          | 1.53                |                               | 0.94               |                              |      |
|        | rs13029707                                    | T            |               | 0.94                    |                     | 0.4                           | 2.17                |                               | 0.88               |                              |      |
|        | rs17715867                                    | C            |               | 1.048 (1.057)           |                     | 0.732 (0.7603)                |                     | 1.502 (1.47)                  |                    | 0.797 (0.7406)               |      |
|        | rs6542217                                     | A            | 0.982         | 0.985 (0.9781)          | 0.832               | 0.835 (0.8                    |                     |                               |                    |                              |      |

| DPP10 | SNPs                                     | minor allele | OR genotyping  | OR imputation HM2 (HM3) | CI_L 95% genotyping | CI_L 95% imputation HM2 (HM3) | CI_U 95% genotyping | CI_U 95% imputation HM2 (HM3) | p-value genotyping | p-value imputation HM2 (HM3) | R2       |
|-------|------------------------------------------|--------------|----------------|-------------------------|---------------------|-------------------------------|---------------------|-------------------------------|--------------------|------------------------------|----------|
|       | rs13035561                               | T            |                | 1.079 (1.046)           |                     | 0.925 (0.9015)                |                     | 1.258 (1.215)                 |                    | 0.333 (0.5508)               |          |
|       | rs7587705                                | A            |                | 1.07                    |                     | 0.91                          |                     | 1.26                          |                    | 0.41                         |          |
|       | rs10201854                               | T            |                | 1.09                    |                     | 0.93                          |                     | 1.28                          |                    | 0.29                         |          |
|       | rs12995783                               | T            |                | 1.26                    |                     | 0.91                          |                     | 1.73                          |                    | 0.16                         |          |
|       | rs4277531                                | T            | 1.059 /        | 1.059 (1.059)           | 0.910 /             | 0.911 (0.9105)                | 1.232 /             | 1.232 (1.232)                 | 0.459 /            | 0.456 (0.4561)               | 1        |
|       | rs10496487                               | T            | 1.111 /        | 1.111 (1.111)           | 0.943 /             | 0.943 (0.9431)                | 1.309 /             | 1.309 (1.309)                 | 0.208 /            | 0.208 (0.2076)               | 1        |
|       | rs10496486                               | G            |                | 0.84                    |                     | 0.66                          |                     | 1.05                          |                    | 0.13                         |          |
|       | rs4459743                                | C            | 1.052 /        | 1.049 (1.046)           | 0.906 /             | 0.904 (0.9015)                | 1.222 /             | 1.218 (1.215)                 | 0.507 /            | 0.527 (0.5508)               | 1        |
|       | rs7579207                                | A            | 1.078 /        | 1.074 (1.074)           | 0.914 /             | 0.911 (0.9107)                | 1.271 /             | 1.266 (1.266)                 | 0.372 /            | 0.397 (0.3968)               | 1        |
|       | rs10496485                               | T            |                | 0.94                    |                     | 0.78                          |                     | 1.14                          |                    | 0.54                         |          |
|       | rs7424115                                | C            | 0.974 /        | 0.97                    | 0.728 /             | 0.73                          | 1.302 /             | 1.3                           | 0.858 /            | 0.86                         | 1        |
|       | rs9677654                                | C            |                | 0.791 (0.8382)          |                     | 0.410 (0.4394)                |                     | 1.523 (1.599)                 |                    | 0.482 (0.5923)               |          |
|       | rs983829                                 | T            | 0.956 /        | 0.94                    | 0.729 /             | 0.72                          | 1.255 /             | 1.23                          | 0.747 /            | 0.65                         | 0.99     |
|       | rs958457                                 | G            | 1.036 /        | 1.042 (0.9381)          | 0.874 /             | 0.878 (0.7147)                | 1.229 /             | 1.235 (1.231)                 | 0.684 /            | 0.639 (0.645)                | 1        |
|       | rs13416481                               | G            |                | 0.895 (0.8833)          |                     | 0.715 (0.7054)                |                     | 1.121 (1.106)                 |                    | 0.335 (0.2794)               |          |
|       | rs2280193                                | A            |                | 0.793 (0.7599)          |                     | 0.557 (0.5361)                |                     | 1.130 (1.077)                 |                    | 0.199 (0.123)                |          |
|       | rs12469615                               | G            |                | 1.03                    |                     | 0.81                          |                     | 1.31                          |                    | 0.8                          |          |
|       | rs17687793                               | C            |                | 1.097 (1.127)           |                     | 0.741 (0.7702)                |                     | 1.624 (1.648)                 |                    | 0.644 (0.5387)               |          |
|       | rs17044138                               | G            |                | 0.8                     |                     | 0.57                          |                     | 1.13                          |                    | 0.21                         |          |
|       | rs17687884                               | C            |                | 0.96                    |                     | 0.59                          |                     | 1.57                          |                    | 0.88                         |          |
|       | rs2420884                                | A            |                | 1.01                    |                     | 0.76                          |                     | 1.35                          |                    | 0.93                         |          |
|       | rs4131302                                | G            | 1.027 /        | 1.020 (1.024)           | 0.877 /             | 0.872 (0.8746)                | 1.202 /             | 1.194 (1.198)                 | 0.742 /            | 0.802 (0.772)                | 1        |
|       | rs10445863                               | C            | 1.037 /        | 1.032 (1.036)           | 0.890 /             | 0.887 (0.8892)                | 1.207 /             | 1.202 (1.206)                 | 0.645 /            | 0.682 (0.6525)               | 0.98     |
|       | rs10195710                               | A            | 1.085 /        | 1.088 (1.085)           | 0.932 /             | 0.935 (0.932)                 | 1.262 /             | 1.263 (1.262)                 | 0.294 /            | 0.276 (0.2941)               | 1        |
|       | rs2176250                                | G            | 1.040 /        | 1.045 (1.067)           | 0.861 /             | 0.865 (0.8818)                | 1.257 /             | 1.265 (1.29)                  | 0.684 /            | 0.649 (0.5065)               | 1        |
|       | rs11693764                               | T            |                | 1.028 (1.019)           |                     | 0.883 (0.8752)                |                     | 1.197 (1.186)                 |                    | 0.719 (0.8088)               |          |
|       | rs11675397                               | G            |                | 1.07                    |                     | 0.91                          |                     | 1.25                          |                    | 0.43                         |          |
|       | rs7558702                                | A            | 1.119 /        | 1.108 (1.108)           | 0.924 /             | 0.916 (0.9158)                | 1.356 /             | 1.340 (1.34)                  | 0.250 /            | 0.292 (0.2923)               | 1        |
|       | rs13005061                               | G            |                | 1.08                    |                     | 0.82                          |                     | 1.41                          |                    | 0.58                         |          |
|       | rs7566462                                | C            |                | 0.93                    |                     | 0.78                          |                     | 1.11                          |                    | 0.44                         |          |
|       | rs2067699                                | G            |                | 0.94                    |                     | 0.71                          |                     | 1.26                          |                    | 0.69                         |          |
|       | rs17044170                               | G            |                | 0.903 (0.9275)          |                     | 0.736 (0.7534)                |                     | 1.108 (1.142)                 |                    | 0.328 (0.478)                |          |
|       | rs11123287                               | A            |                | 0.96                    |                     | 0.83                          |                     | 1.12                          |                    | 0.6                          |          |
|       | rs7593121                                | G            | 1.031 /        | 1.032 (1.032)           | 0.880 /             | 0.882 (0.8815)                | 1.208 /             | 1.209 (1.209)                 | 0.703 /            | 0.692 (0.6921)               | 1        |
|       | rs11896538                               | G            |                | 0.87                    |                     | 0.72                          |                     | 1.07                          |                    | 0.18                         |          |
|       | rs956534                                 | A            |                | 1                       |                     | 0.85                          |                     | 1.17                          |                    | 0.98                         |          |
|       | rs9308710                                | T            | 1.017 /        | 0.932 (0.9315)          | 0.741 /             | 0.683 (0.6834)                | 1.396 /             | 1.270 (1.27)                  | 0.917 /            | 0.653 (0.6532)               | 0.99     |
|       | rs1123288                                | A            |                | 0.941 (0.949)           |                     | 0.790 (0.7967)                |                     | 1.121 (1.13)                  |                    | 0.497 (0.5572)               |          |
|       | rs10496483                               | G            | 1.155 /        | 1.155 (1.136)           | 0.894 /             | 0.895 (0.8804)                | 1.492 /             | 1.490 (1.465)                 | 0.269 /            | 0.268 (0.3277)               | 1        |
|       | rs17355679                               | T            |                | 1.03                    |                     | 0.88                          |                     | 1.21                          |                    | 0.72                         |          |
|       | rs4610066                                | G            |                | 1.03                    |                     | 0.84                          |                     | 1.25                          |                    | 0.8                          |          |
|       | rs4949387                                | G            | 1.143 /        | 1.146 (1.137)           | 0.885 /             | 0.888 (0.8809)                | 1.478 /             | 1.479 (1.467)                 | 0.306 /            | 0.295 (0.3244)               | 0.99     |
|       | rs10204084                               | A            |                | 1                       |                     | 0.86                          |                     | 1.17                          |                    | 0.96                         |          |
|       | rs6542253                                | G            |                | 0.83                    |                     | 0.32                          |                     | 2.16                          |                    | 0.7                          |          |
|       | rs11123289                               | G            |                | 0.99                    |                     | 0.85                          |                     | 1.15                          |                    | 0.89                         |          |
|       | rs12991531                               | T            |                | 1.002 (0.9699)          |                     | 0.751 (0.7288)                |                     | 1.338 (1.291)                 |                    | 0.987 (0.8338)               |          |
|       | rs6542254                                | G            | 0.931 /        | 0.928 (0.9277)          | 0.756 /             | 0.754 (0.7535)                | 1.147 /             | 1.142 (1.142)                 | 0.502 /            | 0.480 (0.4797)               | 1        |
|       | rs10206444                               | G            |                | 1.012 (1.097)           |                     | 0.708 (0.7554)                |                     | 1.446 (1.594)                 |                    | 0.947 (0.6261)               |          |
|       | rs13001269                               | G            | 1.061 /        | 1.061 (1.061)           | 0.808 /             | 0.808 (0.8081)                | 1.392 /             | 1.392 (1.392)                 | 0.671 /            | 0.671 (0.6709)               | 1        |
|       | rs4849389                                | A            | 1.051 /        | 1.03                    | 0.819 /             | 0.81                          | 1.348 /             | 1.31                          | 0.697 /            | 0.84                         | 1        |
|       | rs13009552                               | G            |                | 1.03                    |                     | 0.82                          |                     | 1.29                          |                    | 0.82                         |          |
|       | rs10496482                               | G            |                | 0.956 (0.9637)          |                     | 0.823 (0.8287)                |                     | 1.111 (1.121)                 |                    | 0.558 (0.6311)               |          |
|       | rs12991665                               | A            | 0.959 /        | 0.979 (0.9785)          | 0.633 /             | 0.647 (0.6473)                | 1.452 /             | 1.479 (1.479)                 | 0.842 /            | 0.918 (0.9181)               | 0.99     |
|       | rs6759005                                | C            |                | 0.99                    |                     | 0.75                          |                     | 1.31                          |                    | 0.95                         |          |
|       | rs7577833                                | G            | 0.973 /        | 0.976 (0.9787)          | 0.837 /             | 0.839 (0.8422)                | 1.130 /             | 1.134 (1.137)                 | 0.716 /            | 0.747 (0.7788)               | 1        |
|       | rs13386690                               | G            |                | 0.970 (0.9773)          |                     | 0.822 (0.8274)                |                     | 1.145 (1.154)                 |                    | 0.719 (0.787)                |          |
|       | rs13033618                               | G            |                | 1.1                     |                     | 0.77                          |                     | 1.58                          |                    | 0.59                         |          |
|       | rs4849390                                | T            | 1.003 /        | 1.001 (0.9917)          | 0.834 /             | 0.832 (0.8249)                | 1.206 /             | 1.203 (1.192)                 | 0.973 /            | 0.993 (0.9296)               | 1        |
|       | rs12619497                               | A            | 1.001 /        | 0.979 (0.9785)          | 0.664 /             | 0.647 (0.6473)                | 1.511 /             | 1.479 (1.479)                 | 0.995 /            | 0.918 (0.9181)               | 0.99     |
|       | rs11690705                               | A            | 1.080 /        | 1                       | 0.890 /             | 0.83                          | 1.310 /             | 1.2                           | 0.437 /            | 0.99                         | 0.98     |
|       | rs6741354                                | G            |                | 0.31                    |                     | 0.03                          |                     | 3                             |                    | 0.31                         |          |
|       | rs9646900                                | C            |                | 1.18                    |                     | 0.68                          |                     | 2.04                          |                    | 0.56                         |          |
|       | rs6542256                                | C            | 0.986 /        | 0.977 (0.9774)          | 0.764 /             | 0.758 (0.7583)                | 1.271 /             | 1.260 (1.26)                  | 0.911 /            | 0.860 (0.8598)               | 1        |
|       | rs908599                                 | G            |                | 0.97                    |                     | 0.82                          |                     | 1.15                          |                    | 0.73                         |          |
|       | rs1356383                                | T            |                | 0.93                    |                     | 0.66                          |                     | 1.32                          |                    | 0.7                          |          |
|       | rs2420815                                | C            | 1.009 /        | 0.997 (0.9927)          | 0.853 /             | 0.843 (0.8397)                | 1.193 /             | 1.178 (1.174)                 | 0.921 /            | 0.967 (0.9318)               | 0.99     |
|       | rs10176449                               | T            |                | 1.01                    |                     | 0.86                          |                     | 1.19                          |                    | 0.91                         |          |
|       | rs17044234                               | A            |                | 0.84                    |                     | 0.56                          |                     | 1.26                          |                    | 0.39                         |          |
|       | rs2420819                                | T            | 0.992 /        | 0.990 (0.9902)          | 0.843 /             | 0.841 (0.8413)                | 1.168 /             | 1.165 (1.165)                 | 0.925 /            | 0.906 (0.9058)               | 1        |
|       | rs17623623 *                             | T            |                | 1.62                    |                     | 1.05                          |                     | 2.52                          |                    | 0.03                         |          |
|       | rs17044254                               | C            |                | 0.94                    |                     | 0.62                          |                     | 1.42                          |                    | 0.76                         |          |
|       | rs2421100                                | A            | 0.960 /        | 0.960 (0.9595)          | 0.814 /             | 0.814 (0.8143)                | 1.131 /             | 1.131 (1.131)                 | 0.622 /            | 0.622 (0.6216)               | 1        |
|       | rs70925                                  | C            | 0.937 /        | 0.937 (0.9369)          | 0.806 /             | 0.806 (0.8057)                | 1.089 /             | 1.089 (1.089)                 | 0.397 /            | 0.397 (0.3972)               | 1        |
|       | rs9308712                                | G            | 1.016 /        | 1.016 (1.016)           | 0.833 /             | 0.833 (0.8328)                | 1.240 /             | 1.240 (1.24)                  | 0.875 /            | 0.875 (0.8752)               | 1        |
|       | rs13022199                               | A            |                | 1.007 (0.9992)          |                     | 0.797 (0.7908)                |                     | 1.271 (1.262)                 |                    | 0.957 (0.9944)               |          |
|       | rs2421101                                | C            | 0.964 /        | 0.962 (0.9615)          | 0.829 /             | 0.827 (0.8268)                | 1.122 /             | 1.118 (1.118)                 | 0.638 /            | 0.610 (0.6097)               | 1        |
|       | rs17044296                               | A            |                | 1.18                    |                     | 0.71                          |                     | 1.97                          |                    | 0.52                         |          |
|       | rs1155664                                | G            | 0.877 /        | 0.873 (0.8727)          | 0.715 /             | 0.711 (0.7112)                | 1.076 /             | 1.071 (1.071)                 | 0.210 /            | 0.192 (0.1919)               | 1        |
|       | rs17453235                               | C            |                | 1.130 (1.058)           |                     | 0.909 (0.8464)                |                     | 1.404 (1.322)                 |                    | 0.272 (0.6214)               |          |
|       | rs11683441                               | T            | 1.002 /        | 0.993 (0.9925)          | 0.857 /             | 0.849 (0.8488)                | 1.172 /             | 1.161 (1.161)                 | 0.979 /            | 0.925 (0.9249)               | 1        |
|       | rs7561977                                | A            |                | 0.93                    |                     | 0.69                          |                     | 1.27                          |                    | 0.65                         |          |
|       | rs843399                                 | T            | 0.950 /        | 0.950 (0.95)            | 0.803 /             | 0.803 (0.8025)                | 1.125 /             | 1.125 (1.125)                 | 0.551 /            | 0.551 (0.5511)               | 1        |
|       | rs952747                                 | C            | 0.950 /        | 0.950 (0.95)            | 0.803 /             | 0.803 (0.8025)                | 1.125 /             | 1.125 (1.125)                 | 0.551 /            | 0.551 (0.5511)               | 1        |
|       | rs1717054 (rs843385 / r <sup>2</sup> =1) | T            | <b>1.066 /</b> | <b>1.066 (1.066)</b>    | <b>0.821 /</b>      | <b>0.821 (0.8205)</b>         | <b>1.384 /</b>      | <b>1.384 (1.384)</b>          | <b>0.633 /</b>     | <b>0.633 (0.6334)</b>        | <b>1</b> |
|       | rs2030440                                | T            |                | 0.98                    |                     | 0.84                          |                     | 1.14                          |                    | 0.79                         |          |
|       | rs1517363                                | G            |                | 1.19                    |                     | 0.65                          |                     | 2.19                          |                    | 0.58                         |          |
|       | rs843408                                 | G            |                | 0.974 (0.9712)          |                     | 0.836 (0.834)                 |                     | 1.134 (1.131)                 |                    | 0.735 (0.7072)               |          |
|       | rs843447                                 | T            |                | 0.72                    |                     | 0.47                          |                     | 1.09                          |                    | 0.12                         |          |
|       | rs6732466                                | T            |                | 0.98                    |                     | 0.84                          |                     | 1.15                          |                    | 0.79                         |          |
|       | rs1037205                                | G            | 0.979 /        | 0.979 (0.9859)          | 0.835 /             | 0.835 (0.8407)                | 1.148 /             | 1.148 (1.156)                 | 0.792 /            | 0.792 (0.8616)               | 1        |
|       | rs17362720                               | A            |                | 1.094 (1.076)           |                     | 0.848 (0.8275)                |                     | 1.411 (1.4)                   |                    | 0.489 (0.583)                |          |
|       | rs13033419                               | A            | 1.018 /        | 1.020 (1.019)           | 0.849 /             | 0.851 (0.8504)                | 1.220 /             | 1.222 (1.222)                 | 0.849 /            | 0.833 (0.8355)               | 1        |
|       | rs1868327                                | C            | 1.015 /        | 1.020 (1.02)            | 0.846 /             | 0.851 (0.8506)                | 1.218 /             | 1.222 (1.222)                 | 0.871 /            | 0.833 (0.833)                | 1        |
|       | rs17362881                               | T            |                | 0.92                    |                     | 0.72                          |                     | 1.18                          |                    | 0.52                         |          |
|       | rs17453808                               | T            |                | 1.05                    |                     | 0.4                           |                     | 2.75                          |                    | 0.92                         |          |
|       | rs13429901                               | T            | 0.962 /        | 0.962 (0.9619)          | 0.765 /             | 0.765 (0.7648)                | 1.210 /             | 1.210 (1.21)                  | 0.740 /            | 0.740 (0.7396)               | 1        |
|       | rs7584395                                | A            | 0.996 /        | 0.996 (1.003)           | 0.846 /             | 0.846 (0.8518)                | 1.172 /             | 1.172 (1.18)                  | 0.960 /            | 0.960 (0.9758)               | 1        |
|       | rs1971190                                | C            |                | 1.029 (1.032)           |                     | 0.860 (0.8636)                |                     | 1.231 (1.234)                 |                    | 0.755 (0.7269)               |          |
|       | rs1006342                                | G            | 0.968 /        | 0.968 (0.9616)          | 0.770 /             | 0.770 (0.7648)                | 1.217 /             | 1.217 (1.209)                 | 0.780 /            | 0.780 (0.7372)               | 1        |
|       | rs12471022                               | T            |                | 2.531 (1.752)           |                     | 0.984 (0.6947)                |                     | 6.507 (4.419)                 |                    | 0.054 (0.2347)               |          |
|       | rs17044686                               | A            |                | 0.82                    |                     | 0.55                          |                     | 1.23                          |                    | 0.34                         |          |
|       | rs1545396 (rs756583 / r <sup>2</sup> =1) | T            | <b>0.972 /</b> | <b>0.986 (0.9864)</b>   | <b>0.739 /</b>      | <b>0.750 (0.7501)</b>         | <b>1.280 /</b>      | <b>1.297 (1.297)</b>          | <b>0.841 /</b>     | <b>0.922 (0.9217)</b>        | <b>1</b> |
|       | rs1550985                                | T            | 1.046 /        | 1.035 (1.042)           | 0.887 /             | 0.878 (0.884)                 | 1.233 /             | 1.221 (1.228)                 | 0.594 /            | 0.680 (0.6246)               | 1        |
|       | rs6738130                                | C            | 1.058 /        | 1.042 (1.045)           | 0.889 /             | 0.884 (0.8871)                | 1.259 /             | 1.229 (1.232)                 | 0.524 /            | 0.622 (0.5968)               | 0.99     |
|       | rs921211                                 | C            | 1.019 /        | 1.019 (1.019)           | 0.876 /             | 0.875 (0.8752)                | 1.187 /             | 1.187 (1.187)                 | 0.805 /            | 0.808 (0.8081)               | 1        |
|       | rs17044762                               | G            | 0.826 /        | 0.835 (0.8354)          | 0.595 /             | 0.603 (0.6029)                | 1.146 /             | 1.158 (1.158)                 | 0.252 /            | 0.280 (0.2798)               |          |

| Gene                                         | SNPs                                       | minor allele                                 | OR genotyping          | OR imputation HM2 (HM3) | CI_L 95% genotyping     | CI_L 95% imputation HM2 (HM3) | CI_U 95% genotyping    | CI_U 95% imputation HM2 (HM3) | p-value genotyping      | p-value imputation HM2 (HM3) | R2          |  |
|----------------------------------------------|--------------------------------------------|----------------------------------------------|------------------------|-------------------------|-------------------------|-------------------------------|------------------------|-------------------------------|-------------------------|------------------------------|-------------|--|
| GSTP1                                        | rs7927381                                  | T                                            |                        | 1.273 (1.242)           |                         | 0.981 (0.9596)                |                        | 1.654 (1.608)                 |                         | 0.070 (0.09953)              |             |  |
|                                              | rs614080 **                                | A                                            | 0.778 /                | 0.778 (0.7779)          | 0.668 /                 | 0.668 (0.6679)                | 0.906 /                | 0.906 (0.906)                 | 0.0013 /                | 0.0012 (0.0012)              | 1           |  |
|                                              | rs6591255                                  | A                                            | <b>1.159 /</b>         | <b>(1.192)</b>          | <b>0.990 /</b>          | <b>(1.024)</b>                | <b>1.356 /</b>         | <b>(1.388)</b>                | <b>0.066 /</b>          | <b>(0.02357)</b>             |             |  |
|                                              | rs6591256 *                                | G                                            | 1.190 /                | 1.18                    | 1.022 /                 | 1.01                          | 1.387 /                | 1.37                          | 0.026 /                 | 0.03                         | 0.99        |  |
|                                              | rs1695                                     | G                                            | <b>1.125 /</b>         | <b>(1.165 (1.212))</b>  | <b>0.962 /</b>          | <b>(0.996 (1.034))</b>        | <b>1.316 /</b>         | <b>(1.362 (1.421))</b>        | <b>0.141 /</b>          | <b>(0.056 (0.01765))</b>     | <b>0.94</b> |  |
|                                              | rs1799811                                  | T                                            | 0.985 /                | 1.04                    | 0.758 /                 | 0.81                          | 1.279 /                | 1.35                          | 0.908 /                 | 0.76                         | 1           |  |
|                                              | rs1871042                                  | T                                            |                        | 1.161 (1.227)           |                         | 0.993 (1.047)                 |                        | 1.358 (1.439)                 |                         | 0.061 (0.0116)               |             |  |
| IL12B                                        | rs6870828                                  | C                                            |                        | 0.94                    |                         | 0.81                          |                        | 1.09                          |                         | 0.4                          |             |  |
|                                              | rs1965014                                  | T                                            |                        | 0.92                    |                         | 0.76                          |                        | 1.12                          |                         | 0.43                         |             |  |
|                                              | rs3181224                                  | C                                            | 1.013 /                | 1.01                    | 0.797 /                 | 0.8                           | 1.289 /                | 1.29                          | 0.914 /                 | 0.91                         | 1           |  |
|                                              | rs3212227                                  | G                                            |                        | <b>1.09</b>             |                         | <b>0.9</b>                    |                        | <b>1.32</b>                   |                         | <b>0.4</b>                   |             |  |
|                                              | rs3213120                                  | T                                            |                        | 1.21                    |                         | 0.77                          |                        | 1.9                           |                         | 0.41                         |             |  |
|                                              | rs3213102 *                                | T                                            |                        | 3.04                    |                         | 1.11                          |                        | 8.35                          |                         | 0.03                         |             |  |
|                                              | rs2853694                                  | T                                            |                        | <b>1.028 (1.028)</b>    |                         | <b>0.884 (0.8844)</b>         |                        | <b>1.195 (1.195)</b>          |                         | <b>0.718 (0.7184)</b>        |             |  |
|                                              | rs3213096                                  | T                                            |                        | 5.656 (2.12)            |                         | 0.679 (0.6498)                |                        | 47.100 (6.918)                |                         | 0.109 (0.2129)               |             |  |
|                                              | rs3213094                                  | T                                            |                        | 1.08                    |                         | 0.89                          |                        | 1.31                          |                         | 0.43                         |             |  |
|                                              | rs2569253                                  | T                                            | 1.012 /                | 0.988 (0.9913)          | 0.868 /                 | 0.847 (0.8496)                | 1.181 /                | 1.153 (1.157)                 | 0.877 /                 | 0.879 (0.9112)               | 1           |  |
|                                              | rs2569254                                  | T                                            | <b>0.953 /</b>         | <b>(0.955 (0.9603))</b> | <b>0.784 /</b>          | <b>(0.787 (0.7906))</b>       | <b>1.157 /</b>         | <b>(1.160 (1.166))</b>        | <b>0.624 /</b>          | <b>(0.646 (0.6827))</b>      | <b>1</b>    |  |
|                                              | rs2546891                                  | A                                            |                        | 3.78                    |                         | 0.8                           |                        | 17.84                         |                         | 0.09                         |             |  |
|                                              | rs3181216                                  | T                                            | <b>1.023 /</b>         | <b>(1.02)</b>           | <b>0.866 /</b>          | <b>(0.87)</b>                 | <b>1.209 /</b>         | <b>(1.2)</b>                  | <b>0.789 /</b>          | <b>(0.79)</b>                | <b>0.97</b> |  |
|                                              | rs3213117                                  | C                                            |                        | 1.05                    |                         | 0.69                          |                        | 1.61                          |                         | 0.82                         |             |  |
|                                              | rs1003199                                  | T                                            |                        | 1.013 (0.9847)          |                         | 0.868 (0.8438)                |                        | 1.181 (1.149)                 |                         | 0.872 (0.8449)               |             |  |
|                                              | rs1433048                                  | G                                            | 0.884 /                | 0.872 (0.8816)          | 0.724 /                 | 0.713 (0.7221)                | 1.080 /                | 1.065 (1.076)                 | 0.227 /                 | 0.180 (0.2159)               | 0.98        |  |
|                                              | rs2546893                                  | A                                            |                        | 1.01                    |                         | 0.86                          |                        | 1.17                          |                         | 0.94                         |             |  |
| rs730691                                     | T                                          | 0.983 /                                      | 0.982 (0.9818)         | 0.837 /                 | 0.836 (0.836)           | 1.154 /                       | 1.153 (1.153)          | 0.831 /                       | 0.821 (0.8228)          | 1                            |             |  |
| rs2546890                                    | G                                          | <b>0.980 /</b>                               | <b>(0.96 (0.9685))</b> | <b>0.839 /</b>          | <b>(0.828 (0.8308))</b> | <b>1.144 /</b>                | <b>(1.126 (1.129))</b> | <b>0.795 /</b>                | <b>(0.655 (0.6831))</b> | <b>1</b>                     |             |  |
| rs10052709                                   | G                                          |                                              | 0.98                   |                         | 0.79                    |                               | 1.23                   |                               | 0.89                    |                              |             |  |
| rs1422876                                    | C                                          |                                              | 0.94                   |                         | 0.8                     |                               | 1.09                   |                               | 0.41                    |                              |             |  |
| IL13                                         | rs3091307                                  | G                                            |                        | 1.11                    |                         | 0.93                          |                        | 1.33                          |                         | 0.24                         |             |  |
|                                              | rs1881457                                  | C                                            | <b>1.076 /</b>         | <b>(1.12)</b>           | <b>0.898 /</b>          | <b>(0.9393)</b>               | <b>1.291 /</b>         | <b>(1.334)</b>                | <b>0.427 /</b>          | <b>(0.2074)</b>              |             |  |
|                                              | rs1800925                                  | T                                            | <b>1.085</b>           |                         | <b>0.904</b>            |                               | <b>1.303</b>           |                               | <b>0.380</b>            |                              |             |  |
|                                              | rs1295686 *                                | A                                            | 1.220 /                | 1.230 (1.23)            | 1.016 /                 | 1.024 (1.024)                 | 1.464 /                | 1.478 (1.478)                 | 0.033 /                 | 0.027 (0.02681)              | 0.99        |  |
|                                              | rs20541 *                                  | T                                            | <b>1.227 /</b>         | <b>(1.225 (1.221))</b>  | <b>1.021 /</b>          | <b>(1.020 (1.016))</b>        | <b>1.475 /</b>         | <b>(1.472 (1.468))</b>        | <b>0.029 /</b>          | <b>(0.030 (0.0319))</b>      | <b>1</b>    |  |
|                                              | rs1295683 *                                | A                                            |                        | 1.26                    |                         | 1                             |                        | 1.59                          |                         | 0.05                         |             |  |
|                                              | rs2243297                                  | A                                            |                        | 1.39                    |                         | 0.92                          |                        | 2.11                          |                         | 0.12                         |             |  |
|                                              | rs2243204                                  | T                                            | 1.129 /                | 1.129 (1.129)           | 0.870 /                 | 0.870 (0.8701)                | 1.464 /                | 1.464 (1.464)                 | 0.362 /                 | 0.362 (0.3616)               | 1           |  |
|                                              | rs2243298                                  | A                                            |                        | 2.15                    |                         | 0.7                           |                        | 6.56                          |                         | 0.18                         |             |  |
|                                              | IL4                                        | rs762534                                     | A                      |                         | 1.14                    |                               | 0.86                   |                               | 1.51                    |                              | 0.37        |  |
| rs2243240                                    |                                            | T                                            |                        | 1.62                    |                         | 0.63                          |                        | 4.13                          |                         | 0.32                         |             |  |
| rs2243248                                    |                                            | G                                            |                        | <b>0.988 (0.9442)</b>   |                         | <b>0.772 (0.6999)</b>         |                        | <b>1.291 (1.274)</b>          |                         | <b>0.990 (0.7071)</b>        |             |  |
| rs2243250                                    |                                            | T                                            | <b>1.225 /</b>         | <b>(1.23)</b>           | <b>0.997 /</b>          | <b>(1.006)</b>                | <b>1.505 /</b>         | <b>(1.505)</b>                | <b>0.054 /</b>          | <b>(0.04348)</b>             |             |  |
| rs2070874                                    |                                            | T                                            | <b>1.221 /</b>         | <b>(1.356 (1.23))</b>   | <b>0.997 /</b>          | <b>(1.098 (1.006))</b>        | <b>1.494 /</b>         | <b>(1.675 (1.505))</b>        | <b>0.054 /</b>          | <b>(0.005 (0.04348))</b>     | <b>0.77</b> |  |
| rs2243263                                    |                                            | C                                            |                        | 0.98                    |                         | 0.76                          |                        | 1.25                          |                         | 0.84                         |             |  |
| rs2243274 *                                  |                                            | A                                            |                        | 1.24                    |                         | 1.01                          |                        | 1.52                          |                         | 0.04                         |             |  |
| rs2406539                                    |                                            | T                                            |                        | 1.16                    |                         | 0.98                          |                        | 1.37                          |                         | 0.09                         |             |  |
| IL4R                                         | rs8057585                                  | C                                            |                        | 1.104 (1.097)           |                         | 0.946 (0.9404)                |                        | 1.288 (1.28)                  |                         | 0.209 (0.2388)               |             |  |
|                                              | rs2057768 *                                | C                                            | <b>1.267 /</b>         | <b>(1.119 (1.106))</b>  | <b>1.061 /</b>          | <b>(0.944 (0.9335))</b>       | <b>1.512 /</b>         | <b>(1.326 (1.31))</b>         | <b>0.0089 /</b>         | <b>(0.195 (0.2443))</b>      | <b>0.89</b> |  |
|                                              | rs6498012                                  | T                                            |                        | 1.080 (1.071)           |                         | 0.922 (0.9145)                |                        | 1.263 (1.253)                 |                         | 0.340 (0.3959)               |             |  |
|                                              | rs1110470                                  | A                                            |                        | 0.89                    |                         | 0.76                          |                        | 1.03                          |                         | 0.12                         |             |  |
|                                              | rs4787948                                  | G                                            | 1.110 /                | 1.111 (1.115)           | 0.940 /                 | 0.940 (0.9434)                | 1.312 /                | 1.312 (1.317)                 | 0.218 /                 | 0.217 (0.2022)               | 1           |  |
|                                              | rs2283563                                  | A                                            | 0.896 /                | 0.893 (0.8928)          | 0.761 /                 | 0.759 (0.7588)                | 1.054 /                | 1.050 (1.05)                  | 0.185 /                 | 0.172 (0.1719)               | 1           |  |
|                                              | rs3024530                                  | G                                            | 1.134 /                | 1.134 (1.134)           | 0.975 /                 | 0.975 (0.9748)                | 1.319 /                | 1.319 (1.319)                 | 0.103 /                 | 0.103 (0.1033)               | 1           |  |
|                                              | rs3024536                                  | T                                            | 1.091 /                | 1.091 (1.085)           | 0.889 /                 | 0.889 (0.8842)                | 1.338 /                | 1.338 (1.331)                 | 0.406 /                 | 0.406 (0.4348)               | 1           |  |
|                                              | rs1805010 *                                | G                                            | <b>1.234 /</b>         | <b>(1.149)</b>          | <b>1.053 /</b>          | <b>(0.9865)</b>               | <b>1.446 /</b>         | <b>(1.337)</b>                | <b>0.0093 /</b>         | <b>(0.07421)</b>             |             |  |
|                                              | rs3024560                                  | G                                            |                        | 1.151 (1.157)           |                         | 0.985 (0.9903)                |                        | 1.344 (1.352)                 |                         | 0.078 (0.06614)              |             |  |
|                                              | rs2301807                                  | A                                            |                        | 0.85                    |                         | 0.6                           |                        | 1.2                           |                         | 0.36                         |             |  |
|                                              | rs2239349                                  | A                                            |                        | 0.933 (0.8096)          |                         | 0.542 (0.5906)                |                        | 1.609 (1.11)                  |                         | 0.804 (0.1893)               |             |  |
|                                              | rs2239346 *                                | A                                            |                        | 0.84                    |                         | 0.72                          |                        | 0.98                          |                         | 0.02                         |             |  |
|                                              | rs3116578                                  | T                                            |                        | 1.9                     |                         | 0.85                          |                        | 4.25                          |                         | 0.12                         |             |  |
|                                              | rs3024585 *                                | A                                            | 1.180 /                | 1.179 (1.175)           | 1.014 /                 | 1.013 (1.01)                  | 1.373 /                | 1.371 (1.366)                 | 0.032 /                 | 0.033 (0.03679)              | 1           |  |
|                                              | rs3024613                                  | T                                            |                        | 0.869 (0.8786)          |                         | 0.747 (0.756)                 |                        | 1.010 (1.021)                 |                         | 0.067 (0.09138)              |             |  |
|                                              | rs3024620                                  | G                                            |                        | 0.86                    |                         | 0.6                           |                        | 1.23                          |                         | 0.41                         |             |  |
|                                              | rs3024622 *                                | G                                            |                        | 1.22                    |                         | 1.04                          |                        | 1.42                          |                         | 0.01                         |             |  |
|                                              | rs3024630                                  | G                                            | 0.932 /                | 0.946 (0.9454)          | 0.724 /                 | 0.736 (0.7348)                | 1.199 /                | 1.215 (1.216)                 | 0.582 /                 | 0.661 (0.6621)               | 0.99        |  |
|                                              | rs3024691                                  | A                                            |                        | 0.56                    |                         | 0.13                          |                        | 2.35                          |                         | 0.43                         |             |  |
|                                              | rs3024647                                  | G                                            |                        | 0.94                    |                         | 0.76                          |                        | 1.16                          |                         | 0.55                         |             |  |
|                                              | rs3024660                                  | C                                            | 0.910 /                | 0.943 (0.912)           | 0.741 /                 | 0.765 (0.742)                 | 1.118 /                | 1.163 (1.121)                 | 0.371 /                 | 0.584 (0.3811)               | 0.96        |  |
|                                              | rs2234897                                  | C                                            |                        | 0.85                    |                         | 0.52                          |                        | 1.39                          |                         | 0.51                         |             |  |
|                                              | rs1805011                                  | C                                            | <b>1.114 /</b>         | <b>(1.103 (1.103))</b>  | <b>0.870 /</b>          | <b>(0.862 (0.8624))</b>       | <b>1.428 /</b>         | <b>(1.411 (1.411))</b>        | <b>0.392 /</b>          | <b>(0.435 (0.4346))</b>      | <b>1</b>    |  |
| rs1805011 (rs2234898 / r <sup>2</sup> =0.95) | C                                          | <b>1.114 /</b>                               | <b>(1.103 (1.104))</b> | <b>0.870 /</b>          | <b>(0.862 (0.8628))</b> | <b>1.428 /</b>                | <b>(1.411 (1.413))</b> | <b>0.392 /</b>                | <b>(0.435 (0.4311))</b> | <b>1</b>                     |             |  |
| rs1805012                                    | C                                          | <b>1.111 /</b>                               | <b>(1.104 (1.104))</b> | <b>0.865 /</b>          | <b>(0.863 (0.8628))</b> | <b>1.427 /</b>                | <b>(1.413 (1.413))</b> | <b>0.411 /</b>                | <b>(0.431 (0.4311))</b> | <b>1</b>                     |             |  |
| rs2234900                                    | C                                          | - /                                          | (1.104)                | - /                     | (0.8628)                | - /                           | (1.413)                | - /                           | (0.4311)                |                              |             |  |
| rs1805015                                    | C                                          | <b>1.035 /</b>                               | <b>(1.030 (1.024))</b> | <b>0.842 /</b>          | <b>(0.838 (0.8293))</b> | <b>1.272 /</b>                | <b>(1.265 (1.264))</b> | <b>0.744 /</b>                | <b>(0.782 (0.828))</b>  | <b>1</b>                     |             |  |
| rs1801275                                    | G                                          | <b>1.052 /</b>                               | <b>(1.05)</b>          | <b>0.874 /</b>          | <b>(0.87)</b>           | <b>1.267 /</b>                | <b>(1.27)</b>          | <b>0.589 /</b>                | <b>(0.59)</b>           | <b>1</b>                     |             |  |
| rs1805016                                    | G                                          |                                              | 0.848 (0.9305)         |                         | 0.602 (0.6517)          |                               | 1.195 (1.328)          |                               | 0.347 (0.6917)          |                              |             |  |
| rs2074570                                    | C                                          |                                              | 1.13                   |                         | 0.77                    |                               | 1.67                   |                               | 0.53                    |                              |             |  |
| rs1049631                                    | G                                          | 1.083 /                                      | 1.084 (1.084)          | 0.931 /                 | 0.932 (0.9315)          | 1.260 /                       | 1.260 (1.26)           | 0.301 /                       | 0.298 (0.2983)          | 1                            |             |  |
| rs3024698                                    | A                                          |                                              | 0.85                   |                         | 0.46                    |                               | 1.57                   |                               | 0.6                     |                              |             |  |
| rs3024685                                    | C                                          |                                              | 1.020 (1.027)          |                         | 0.874 (0.8805)          |                               | 1.190 (1.198)          |                               | 0.802 (0.7353)          |                              |             |  |
| rs12102586                                   | T                                          |                                              | 1.04                   |                         | 0.8                     |                               | 1.36                   |                               | 0.78                    |                              |             |  |
| rs4787956                                    | G                                          |                                              | 1.037 (1.049)          |                         | 0.886 (0.8969)          |                               | 1.214 (1.227)          |                               | 0.650 (0.5495)          |                              |             |  |
| PTGDR                                        | rs803014                                   | A                                            |                        | 1.07                    |                         | 0.86                          |                        | 1.33                          |                         | 0.56                         |             |  |
|                                              | rs803012 (rs708487 / r <sup>2</sup> =1)    | C                                            | <b>0.939 /</b>         | <b>(0.941 (0.9412))</b> | <b>0.784 /</b>          | <b>(0.786 (0.7863))</b>       | <b>1.124 /</b>         | <b>(1.127 (1.127))</b>        | <b>0.493 /</b>          | <b>(0.509 (0.5087))</b>      | <b>1</b>    |  |
|                                              | rs803011                                   | T                                            |                        | 0.945                   |                         | 0.786                         |                        | 1.137                         |                         | 0.52                         |             |  |
|                                              | rs8004654                                  | T                                            | <b>0.913 /</b>         | <b>(0.9531)</b>         | <b>0.782 /</b>          | <b>(0.8204)</b>               | <b>1.066 /</b>         | <b>(1.107)</b>                | <b>0.250 /</b>          | <b>(0.5302)</b>              |             |  |
|                                              | rs11157907                                 | C                                            | <b>0.975</b>           |                         | <b>0.788</b>            |                               | <b>1.207</b>           |                               | <b>0.816</b>            |                              |             |  |
|                                              | rs11851957                                 | T                                            | 0.957 /                | 0.957 (0.9516)          | 0.775 /                 | 0.775 (0.7703)                | 1.182 /                | 1.182 (1.176)                 | 0.684 /                 | 0.684 (0.6457)               | 1           |  |
|                                              | rs17831669                                 | C                                            |                        | 1.134 (1.111)           |                         | 0.866 (0.8503)                |                        | 1.484 (1.453)                 |                         | 0.361 (0.4392)               |             |  |
|                                              | rs708486                                   | C                                            | <b>0.987 /</b>         | <b>(0.99)</b>           | <b>0.847 /</b>          | <b>(0.85)</b>                 | <b>1.150 /</b>         | <b>(1.15)</b>                 | <b>0.866 /</b>          | <b>(0.87)</b>                | <b>1</b>    |  |
|                                              | rs810633 (rs803010 / r <sup>2</sup> =0.85) | T                                            | <b>1.042 /</b>         | <b>(1.042 (1.042))</b>  | <b>0.879 /</b>          | <b>(0.879 (0.8785))</b>       | <b>1.235 /</b>         | <b>(1.235 (1.235))</b>        | <b>0.639 /</b>          | <b>(0.639 (0.6391))</b>      | <b>1</b>    |  |
|                                              | rs12895027                                 | T                                            |                        | 1.155 (1.581)           |                         | 0.651 (0.8259)                |                        | 2.048 (3.025)                 |                         | 0.623 (0.1669)               |             |  |
|                                              | rs1953367                                  | C                                            | 1.012 /                | 1.014 (1.005)           | 0.848 /                 | 0.849 (0.8428)                | 1.207 /                | 1.210 (1.199)                 | 0.898 /                 | 0.881 (0.9552)               | 0.99        |  |
|                                              | TNF                                        | rs915654                                     | A                      |                         | 1.12                    |                               | 0.95                   |                               | 1.31                    |                              | 0.18        |  |
|                                              |                                            | rs2844482 (rs1800630 / r <sup>2</sup> =0.89) | A                      | <b>1.145 /</b>          | <b>(1.170 (1.17))</b>   | <b>0.940 /</b>                | <b>(0.962 (0</b>       |                               |                         |                              |             |  |
